# Supplementary material
Source: MDPI journal article supplement (https://www.mdpi.com/2073-4344/8/2/87)
Supplement: s1 [file s1]

***Supporting Materials:* The H2-Treated TiO2 Supported Pt Catalysts Prepared by Strong Electrostatic Adsorption for Liquid-Phase Selective Hydrogenation**

Sasithorn Kuhaudomlap 1, Okorn Mekasuwandumrong 2, Piyasan Praserthdam 1,
Shin-Ichiro Fujita 3, Masahiko Arai 3, and Joongjai Panpranot 1,*

1 Center of Excellence on Catalysis and Catalytic Reaction Engineering, Department of Chemical Engineering, Faculty of Engineering, Chulalongkorn University, Bangkok 10330, Thailand; sasithorn9349@gmail.com (S.K.); piyasan.p@chula.ac.th (P.P.)

2Department of Chemical Engineering, Faculty of Engineering and Industrial Technology, Silpakorn University, Nakorn Pathom 73000, Thailand; okornmeka@gmail.com

3Division of Applied Chemistry, Faculty of Engineering, Hokkaido University, Sapporo 060-8628, Japan; sfuji@eng.hokudai.ac.jp (S.-I.F.); marai@eng.hokudai.ac.jp (M.A.)

***** Correspondence: joongjai.p@chula.ac.th; Tel.: +66-2218-6869; Fax: +66-2218-6877

**Table S1.** Pt loading from ICP-OES of the 0.5 wt % Pt/TiO2 catalysts.

| Catalyst | Method | Pt loadinga (wt%) |
| --- | --- | --- |
| Pt/TiO2-H2 | Impregnation | 0.44 |
| Pt/TiO2-air | Impregnation | 0.44 |
| Pt/TiO2-H2 | SEA | 0.45 |
| Pt/TiO2-air | SEA | 0.46 |





**Figure S1.** The XRD patterns of Pt/TiO2 catalysts.

© 2018 by the authors. Submitted for possible open access publication under the
terms and conditions of the Creative Commons Attribution (CC BY) license (http://creativecommons.org/licenses/by/4.0/).
